# Supplementary material for: Molecular Pathways for Immune Recognition of Preproinsulin Signal Peptide in Type 1 Diabetes
Source: Oxford University Press journal article supplement (doi:10.2337/db17-0021), 2018-01-17
Supplement: db170021supplementarydata.pdf [file db170021supplementarydata.pdf]

## SUPPLEMENTARY DATA

**Supplementary Table S1.** Site directed mutation of signal peptide of preproinsulin

| Designation               | Sequence                         |
|---------------------------|----------------------------------|
| Wild type PPI SP sequence | MALWMRLLPLLALLALWGPDPAAA         |
| 9L mutant                 | MALWMRLL <u>LLLLLL</u> LWGPDPAAA |
| 12L mutant                | MALWMRLLLLL <u>LLL</u> LWGPDPAAA |
| 15L mutant                | MALWMRLLLLLLL <u>L</u> LWGPDPAAA |
| 9L/12L mutant             | MALWMRLL <u>LLL</u> LLLWGPDPAAA  |
| 9L/15L mutant             | MALWMRLL <u>LLLLL</u> LWGPDPAAA  |
| 12L/15L mutant            | MALWMRLLLLL <u>LL</u> LWGPDPAAA  |
| 9L/12L/15L mutant         | MALWMRLL <u>LLL</u> LLWGPDPAAA   |

## SUPPLEMENTARY DATA

**Supplementary Table S2.** Details of subjects studied for pancreatic expression of antigen processing enzymes

| Case ID | Group               | Source                     | Donor Status | Age (years) | Duration   |
|---------|---------------------|----------------------------|--------------|-------------|------------|
| 485 88  | No diabetes control | UK Pancreas Biobank        | Autopsy      | 2           |            |
| 315 89  | No diabetes control | UK Pancreas Biobank        | Autopsy      | 9           |            |
| 65 71   | No diabetes control | UK Pancreas Biobank        | Autopsy      | 40          |            |
| 8579    | No diabetes control | UK Pancreas Biobank        | Autopsy      | 7           |            |
| 540 91  | No diabetes control | UK Pancreas Biobank        | Autopsy      | 11          |            |
| PAN8    | No diabetes control | UK Pancreas Biobank        | Autopsy      | 19          |            |
| E560    | Type 1 diabetes     | UK Type 1 diabetes Biobank | Organ Donor  | 42          | 1.5y       |
| Sc115   | Type 1 diabetes     | UK Type 1 diabetes Biobank | Autopsy      | 1           | 0 'Recent' |
| E124B   | Type 1 diabetes     | UK Type 1 diabetes Biobank | Autopsy      | 17          | 0 'Recent' |
| E375    | Type 1 diabetes     | UK Type 1 diabetes Biobank | Autopsy      | 11          | unknown    |
| 11746   | Type 1 diabetes     | UK Type 1 diabetes Biobank | Autopsy      | 6           | 1 week     |
| 11713   | Type 1 diabetes     | UK Type 1 diabetes Biobank | Autopsy      | 3           | 3 months   |

## SUPPLEMENTARY DATA

**Supplementary Table S3. Details of the staining protocol for each antibody employed in the current study.** Where multiple antigens were stained on the same section, antibodies were applied sequentially (staining order: anti-TAP1 (overnight at 4°C) followed by anti-HLA-ABC (1h at room temperature) or anti-glucagon (1h at room temperature) then anti-insulin plus DAPI (1h at room temperature)).

| Primary Antibody | Manufacturer and clone                            | Antigen Retrieval            | Antibody Dilution | Incubation time with primary antibody | Secondary Detection System                                                                                                  |
|------------------|---------------------------------------------------|------------------------------|-------------------|---------------------------------------|-----------------------------------------------------------------------------------------------------------------------------|
| <b>HLA-ABC</b>   | Abcam C#ab70328<br>Mouse monoclonal<br>EMR8-5     | 10mM citrate pH6.0           | 1/1000            | 1h at RT                              | Immunofluorescence staining using anti-mouse IgG (H+L)<br>Alexa Fluor™-conjugated secondary antibodies (1/400 for 1h)       |
| <b>Insulin</b>   | DakoC#A0564<br>Guinea-pig polyclonal              | 10mM citrate pH6.0           | 1/700             | 1h at RT                              | Immunofluorescence staining using anti-guinea-pig IgG (H+L)<br>Alexa Fluor™ -conjugated secondary antibodies (1/400 for 1h) |
| <b>Glucagon</b>  | AbcamC#ab92517<br>Rabbitmonoclonal<br>EP3070      | 10mM citrate pH6.0           | 1/4000            | 1h at RT                              | Immunofluorescence staining using anti-rabbit IgG (H+L)<br>Alexa Fluor™-conjugated secondary antibodies (1/400 for 1h)      |
| <b>TAP1</b>      | Protein Tech<br>C#11114-1-AP<br>Rabbit polyclonal | 10mM citrate pH6.0           | 1/200             | o/n 4°C                               | Immunofluorescence staining using anti-rabbit IgG (H+L)<br>Alexa Fluor™ -conjugated secondary antibodies (1/400 for 1h)     |
| <b>ERAP</b>      | R & D Systems<br>C#AF2334<br>Goat polyclonal      | 10mM Tris, 1mM<br>EDTA pH9.0 | 1/200             | o/n 4°C                               | Dako REAL™ Envision™ Detection System with anti-goat<br>IgG HRP-conjugated secondary antibodies (1/800 for 1h).             |

## SUPPLEMENTARY DATA

**Supplementary Table S4.** Oligonucleotides used for CRISPR-mediated gene knockout.

|                | Forward                   | Reverse                   |
|----------------|---------------------------|---------------------------|
| <b>Exon 2</b>  | GAAGCGGGCGGCATCCCGGCGTTTT | GCCGGGATGCCGCCCCTTCCGGTG  |
| <b>Exon 3</b>  | GCAGGAGGTTGATGTACTCCGTTTT | GGAGTACATCAACCTCCTGCCGGTG |
| <b>Exon 10</b> | GCAGCCTACATCTTCGGCCTGTTTT | AGGCCGAAGATGTAGGCTGCCGGTG |
| <b>Exon 11</b> | CAGGACAGGAAAACCGATGCGTTTT | GCATCGGTTTTCTGTCCTGCGGTG  |

## SUPPLEMENTARY DATA

**Supplementary Table S5.** Eluted epitopes are not selectively derived from SP containing source protein nor their signal peptide region.

|                                                               | <b>HLA-A*02:01</b> | <b>HLA-A*11:01</b> | <b>HLA-A*24:02</b> | <b>HLA-B*18:01</b> | <b>HLA-B*38:01</b> | <b>HLA-B*39:06</b> | <b>All HLA</b> | <b>Human proteome</b> |
|---------------------------------------------------------------|--------------------|--------------------|--------------------|--------------------|--------------------|--------------------|----------------|-----------------------|
| <b>Source proteins</b>                                        | <b>458</b>         | <b>667</b>         | <b>190</b>         | <b>510</b>         | <b>378</b>         | <b>259</b>         | <b>2462</b>    | <b>20226</b>          |
| <b>Number of source proteins containing a signal peptide</b>  | <b>26</b>          | <b>29</b>          | <b>17</b>          | <b>25</b>          | <b>35</b>          | <b>21</b>          | <b>153</b>     | <b>3560</b>           |
| <b>Frequency of signal peptide containing source proteins</b> | <b>5.68%</b>       | <b>4.35%</b>       | <b>8.95%</b>       | <b>4.90%</b>       | <b>9.26%</b>       | <b>8.11%</b>       | <b>6.21%</b>   | <b>17.6%</b>          |
| <b>Number of proteins with signal peptide-derived epitope</b> | <b>12</b>          | <b>2</b>           | <b>4</b>           | <b>5</b>           | <b>4</b>           | <b>13</b>          | <b>40</b>      |                       |
| <b>Frequency of identified SP epitopes from SP-Protein</b>    | <b>46.15%</b>      | <b>6.90%</b>       | <b>23.53%</b>      | <b>20.00%</b>      | <b>11.43%</b>      | <b>61.90%</b>      | <b>26.14%</b>  |                       |

Source Proteins are those represented by at least one epitope with Mascot Score >40 within our HLA class I elution data (1). Uniprot (2) ( access via <http://www.uniprot.org/>) retrieve/ID mapping function was used to identify signal peptide containing source proteins. SP, signal peptide.

## SUPPLEMENTARY DATA

**Supplementary Table S6.** Putative PPI epitopes identified in silico binding prediction algorithms.

Binding prediction were performed by SYFPEITHI (3) (access via : [www.syfpeithi.de](http://www.syfpeithi.de)) to identify putative PPI epitopes to compare eluted epitopes to those identified in silico. Epitopes derived from the PPI signal peptide are highlighted in bold and those identified by elution in green.

| A2 | 9-mer | Score     | A11 | 9-mer | Score     | A24 | 9-mer | Score     | B18 | 8-mer | Score    | B38 | 9-mer | Score     |    |
|----|-------|-----------|-----|-------|-----------|-----|-------|-----------|-----|-------|----------|-----|-------|-----------|----|
| 1  | 6     | RLLPLLALL | 31  | 38    | ALYLVCGER | 18  | 6     | RLLPLLALL | 15  | 34    | HLVEALYL | 15  | 33    | SHLVEALYL | 21 |
| 2  | 2     | ALWMRLPL  | 28  | 81    | ALEGSQKR  | 18  | 17    | WGPDPAAAF | 13  | 36    | VEALYLCV | 14  | 5     | MRLPLLAL  | 18 |
| 3  | 34    | HLVEALYL  | 27  | 35    | LVEALYLCV | 16  | 39    | LYLVCGERG | 13  | 56    | REAEQLQV | 14  | 6     | RLLPLLALL | 14 |
| 4  | 60    | DLQVGQVEL | 25  | 75    | GSLQPLALE | 16  | 97    | TSICSLYQL | 13  | 61    | LQVGQVEL | 13  | 3     | LWMRLPLL  | 13 |
| 5  | 15    | ALWGPDPA  | 22  | 76    | SLQPLALEG | 16  | 3     | LWMRLPLL  | 12  | 32    | GSHLVEAL | 12  | 2     | ALWMRLPL  | 12 |
| 6  | 8     | LPLLALLAL | 20  | 32    | GSHLVEALY | 15  | 5     | MRLPLLAL  | 12  | 42    | VCGERGFF | 12  | 8     | LPLLALLAL | 12 |
| 7  | 3     | LWMRLPLL  | 19  | 80    | LALEGSQK  | 15  | 8     | LPLLALLAL | 12  | 58    | AEDLQVGQ | 12  | 31    | CGSHLVEAL | 12 |
| 8  | 5     | MRLPLLAL  | 19  | 62    | QVGQVELGG | 14  | 22    | AAAFVNQHL | 12  | 3     | LWMRLPL  | 11  | 60    | DLQVGQVEL | 12 |
| 9  | 81    | ALEGSQKR  | 19  | 84    | GSLQKRGI  | 14  | 31    | CGSHLVEAL | 12  | 6     | RLLPLLAL | 11  | 72    | PGAGSLQPL | 12 |
| 10 | 7     | LPLLALLA  | 18  | 85    | SLQKRGI   | 14  | 33    | SHLVEALYL | 12  | 9     | PLLALLAL | 11  | 74    | AGSLQPLAL | 12 |
| 11 | 76    | SLQPLALEG | 18  | 96    | CTSICSLYQ | 14  | 49    | FYTPKTRRE | 12  | 33    | SHLVEALY | 11  | 97    | TSICSLYQL | 12 |
| 12 | 22    | AAAFVNQHL | 17  | 2     | ALWMRLPL  | 13  | 78    | QPLALEGSL | 12  | 41    | LVCGERGF | 11  | 28    | QHLGCSHLV | 11 |
| 13 | 69    | GGGPGAGSL | 17  | 4     | WMRLPLLA  | 13  | 2     | ALWMRLPL  | 11  | 44    | GERGFFYT | 11  | 69    | GGGPGAGSL | 11 |
| 14 | 97    | TSICSLYQL | 17  | 7     | LPLLALLA  | 13  | 53    | KTRREAEDL | 11  | 66    | VELGGGPG | 11  | 78    | QPLALEGSL | 11 |
| 15 | 9     | PLLALLALW | 16  | 47    | GFFYTPKTR | 13  | 69    | GGGPGAGSL | 11  | 75    | GSLQPLAL | 11  | 94    | QCCTSICSL | 11 |
| 16 | 10    | LLALLALWG | 16  | 10    | LLALLALWG | 12  | 74    | AGSLQPLAL | 11  | 82    | LEGSQKR  | 11  | 22    | AAAFVNQHL | 10 |
| 17 | 31    | CGSHLVEAL | 16  | 29    | HLCGSHLVE | 12  | 94    | QCCTSICSL | 11  | 92    | VEQCCTSI | 11  | 91    | IVEQCCTSI | 10 |
| 18 | 58    | AEDLQVGQV | 16  | 60    | DLQVGQVEL | 12  | 27    | NQHLGCSHL | 10  | 96    | CTSICSLY | 11  | 17    | WGPDPAAAF | 9  |
| 19 | 94    | QCCTSICSL | 16  | 98    | SICSLYQLE | 12  | 40    | YLVCGERGF | 10  | 1     | MALWMRL  | 10  | 27    | NQHLGCSHL | 9  |
| 20 | 12    | ALLALWGPD | 15  | 12    | ALLALWGPD | 11  | 41    | LVCGERGF  | 10  | 18    | GPDPAAAF | 10  | 41    | LVCGERGF  | 9  |
| 21 | 13    | LLALWGPD  | 15  | 41    | LVCGERGF  | 11  | 60    | DLQVGQVEL | 10  | 43    | CGERGFFY | 10  | 53    | KTRREAEDL | 9  |
| 22 | 18    | GPDPAAAFV | 15  | 45    | ERGFYTPK  | 11  | 72    | PGAGSLQPL | 10  | 54    | TRREAEDL | 10  | 83    | EGSLQKRGI | 9  |
| 23 | 28    | QHLGCSHLV | 15  | 50    | YTPKTRREA | 11  | 83    | EGSLQKRGI | 10  | 101   | SLYQLENY | 10  | 40    | YLVCGERGF | 8  |
| 24 | 33    | SHLVEALYL | 15  | 53    | KTRREAEDL | 11  | 91    | IVEQCCTSI | 10  | 4     | WMRLPLL  | 9   | 55    | RREAEDLQV | 8  |
| 25 | 38    | ALYLVCGER | 15  | 97    | TSICSLYQL | 11  | 102   | LYQLENYCN | 10  | 7     | LPLLALL  | 9   | 54    | TRREAEDLQ | 7  |

| A2 | 10-mer | Score      | A11 | 10-mer | Score      | A24 | 10-mer | Score      | B18 | 9-mer | Score     | B38 | 10-mer | Score      |    |
|----|--------|------------|-----|--------|------------|-----|--------|------------|-----|-------|-----------|-----|--------|------------|----|
| 1  | 2      | ALWMRLPLL  | 28  | 79     | PLALEGSQK  | 21  | 39     | LYLVCGERGF | 22  | 100   | CSLYQLENY | 15  | 5      | MRLPLLALL  | 19 |
| 2  | 7      | LPLLALLAL  | 28  | 75     | GSLQPLALEG | 20  | 5      | MRLPLLALL  | 14  | 60    | DLQVGQVEL | 14  | 59     | EDLQVGQVEL | 14 |
| 3  | 4      | WMRLPLLAL  | 24  | 84     | GSLQKRGI   | 19  | 26     | VNQHLCGSHL | 13  | 31    | CGSHLVEAL | 13  | 7      | LPLLALLAL  | 13 |
| 4  | 29     | HLCGSHLVEA | 24  | 32     | GSHLVEALYL | 18  | 1      | MALWMRLPL  | 12  | 44    | GERGFFYTP | 13  | 73     | GAGSLQPLAL | 13 |
| 5  | 15     | ALWGPDPA   | 22  | 6      | RLLPLLALLA | 15  | 2      | ALWMRLPLL  | 12  | 56    | REAEQLQVG | 13  | 1      | MALWMRLPL  | 12 |
| 6  | 1      | MALWMRLPL  | 21  | 35     | LVEALYLVCG | 15  | 7      | LPLLALLAL  | 12  | 8     | LPLLALLAL | 12  | 2      | ALWMRLPLL  | 12 |
| 7  | 90     | GIVEQCCTSI | 21  | 85     | SLQKRGI    | 15  | 30     | LCGSHLVEAL | 12  | 36    | VEALYLVCG | 12  | 4      | WMRLPLLAL  | 12 |
| 8  | 85     | SLQKRGI    | 20  | 98     | SICSLYQLE  | 15  | 59     | EDLQVGQVEL | 12  | 58    | AEDLQVGQV | 12  | 32     | GSHLVEALYL | 12 |
| 9  | 6      | RLLPLLALLA | 19  | 44     | GERGFFYTPK | 14  | 77     | LQPLALEGSL | 12  | 74    | AGSLQPLAL | 12  | 33     | SHLVEALYL  | 12 |
| 10 | 10     | LLALLALWGP | 19  | 9      | PLLALLALWG | 13  | 90     | GIVEQCCTSI | 12  | 78    | QPLALEGSL | 12  | 68     | LGGGPGAGSL | 12 |
| 11 | 33     | SHLVEALYL  | 19  | 97     | TSICSLYQLE | 13  | 16     | LWGPDPAAF  | 11  | 82    | LEGSQKR   | 12  | 93     | EQCCTSICSL | 12 |
| 12 | 76     | SLQPLALEGS | 19  | 29     | HLCGSHLVEA | 12  | 21     | PAAAFVNQHL | 11  | 3     | LWMRLPLL  | 11  | 26     | VNQHLCGSHL | 11 |
| 13 | 96     | CTSICSLYQL | 19  | 47     | GFFYTPKTRR | 12  | 49     | FYTPKTRREA | 11  | 5     | MRLPLLAL  | 11  | 28     | QHLGCSHLVE | 11 |
| 14 | 5      | MRLPLLALL  | 18  | 53     | KTRREAEDLQ | 12  | 52     | PKTRREAEDL | 11  | 6     | RLLPLLALL | 11  | 30     | LCGSHLVEAL | 11 |
| 15 | 13     | LLALWGPDPA | 18  | 2      | ALWMRLPLL  | 11  | 73     | GAGSLQPLAL | 11  | 32    | GSHLVEALY | 11  | 52     | PKTRREAEDL | 11 |
| 16 | 30     | LCGSHLVEAL | 17  | 12     | ALLALWGPD  | 11  | 93     | EQCCTSICSL | 11  | 42    | VCGERGFFY | 11  | 71     | GPAGSLQPL  | 11 |
| 17 | 73     | GAGSLQPLAL | 17  | 15     | ALWGPDPA   | 11  | 40     | YLVCGERGF  | 10  | 95    | CCTSICSLY | 11  | 96     | CTSICSLYQL | 11 |
| 18 | 68     | LGGGPGAGSL | 16  | 34     | HLVEALYLCV | 11  | 68     | LGGGPGAGSL | 10  | 9     | PLLALLALW | 10  | 16     | LWGPDPAAF  | 10 |
| 19 | 80     | LALEGSQKR  | 16  | 41     | LVCGERGFFY | 11  | 71     | GPAGSLQPL  | 10  | 27    | NQHLGCSHL | 10  | 21     | PAAAFVNQHL | 10 |
| 20 | 12     | ALLALWGPD  | 15  | 100    | CSLYQLENYC | 11  | 82     | LEGSQKRGI  | 10  | 40    | YLVCGERGF | 10  | 77     | LQPLALEGSL | 10 |
| 21 | 57     | EADLQVGQV  | 15  | 4      | WMRLPLLAL  | 10  | 96     | CTSICSLYQL | 10  | 41    | LVCGERGF  | 10  | 40     | YLVCGERGF  | 9  |
| 22 | 71     | GPAGSLQPL  | 15  | 7      | LPLLALLAL  | 10  | 4      | WMRLPLLAL  | 9   | 66    | VELGGGPGA | 10  | 54     | TRREAEDLQV | 9  |
| 23 | 14     | LALWGPDPA  | 14  | 25     | FVNQHLCGSH | 10  | 32     | GSHLVEALYL | 9   | 2     | ALWMRLPL  | 9   | 39     | LYLVCGERGF | 8  |
| 24 | 77     | LQPLALEGSL | 14  | 37     | EALYLVCGER | 10  | 24     | AFVNQHLCGS | 6   | 17    | WGPDPAAAF | 9   | 45     | ERGFYTPKT  | 8  |
| 25 | 101    | SLYQLENYCN | 14  | 46     | RGFFYTPKTR | 10  | 42     | VCGERGFFY  | 6   | 53    | KTRREAEDL | 9   | 55     | RREAEDLQVG | 8  |

## SUPPLEMENTARY DATA

**Supplementary Figure S1. Representative Expression of HLA class I and secretion of proinsulin.** Expression of HLA class I and secretion of proinsulin by the generated K562-PPI (dashed line) and K562-PPI-HLA (solid line) cell lines (isotype control grey shaded). Single cell cloning was performed to select for the K562-PPI-HLA cell line with best combination of HLA class I expression (left) and Proinsulin expression (right). Data is representative, with B\*3906 shown, and similar data obtained for A\*11:01, B\*1801 and B\*38:01.

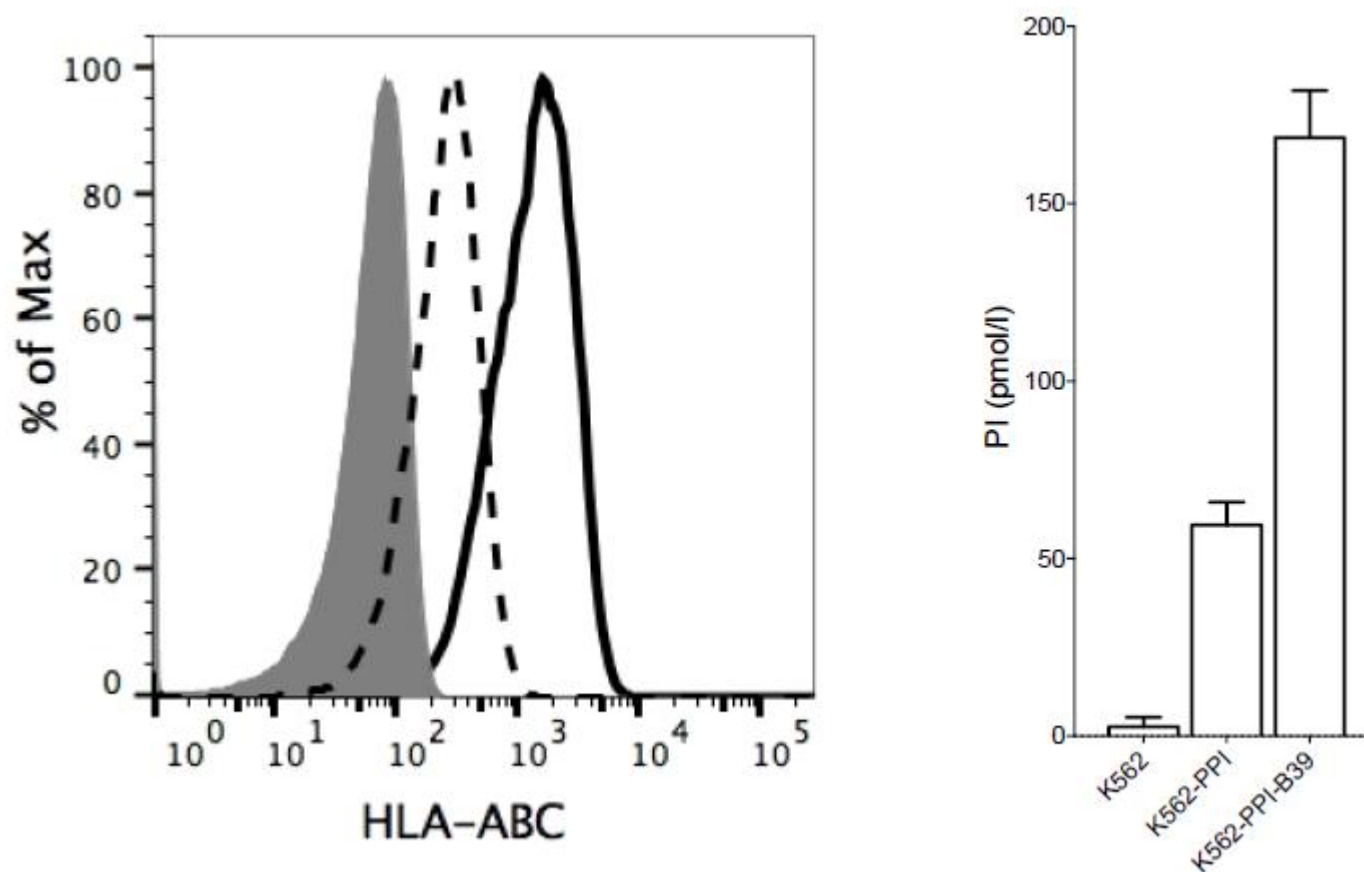

SUPPLEMENTARY DATA

**Supplementary Figure S2. PPI epitope discovery** Tandem mass spectrometry analysis of collision-induced dissociation revealing the tandem mass spectrum of a PPI peptide (A) HLA-A\*1101 Epitope PPI<sub>80-88</sub> (LALEGLSQQK), (B) HLA-B\*3801 Epitope PPI<sub>5-14</sub> (MRLPLALL) and (C) HLA-B\*3801 Epitope PPI<sub>33-41</sub> (SHLVEALYL) . The correct identity of the peptide was proven by tandem mass spectrometry of the synthetic compound. The table lists the amino acid sequence of the peptide with the expected b- and y-fragment ions (fragment ions extending from the amino- and carboxyl terminus respectively). Observed fragment ions are underlined.

Supplementary Figure 2 A) HLA-A\*1101 Epitope PPI<sub>80-88</sub>

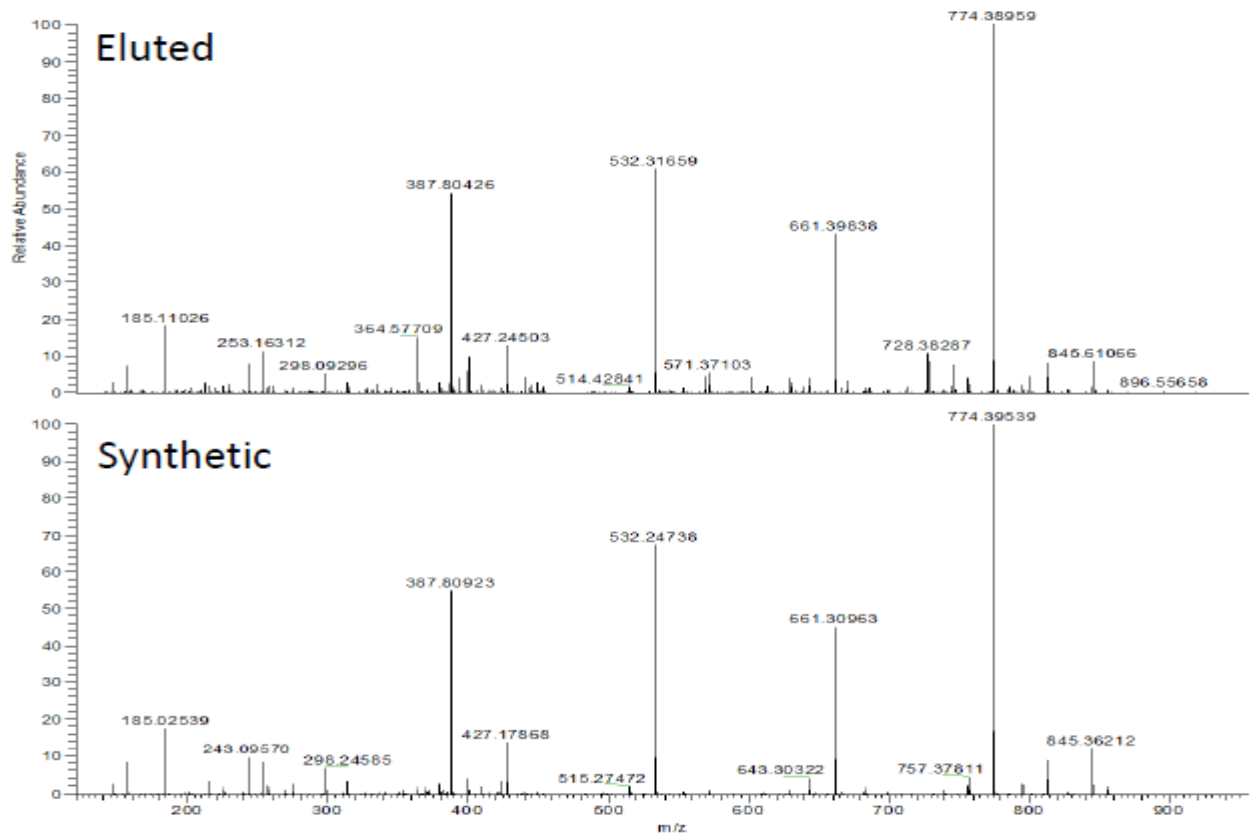

|                     |       |              |              |              |              |              |              |              |              |
|---------------------|-------|--------------|--------------|--------------|--------------|--------------|--------------|--------------|--------------|
| b <sub>n</sub> ions | 114.1 | <u>185.1</u> | <u>298.2</u> | <u>427.3</u> | 484.3        | <u>571.3</u> | <u>684.4</u> | <u>812.5</u> | 958.6        |
| Peptide             | L     | A            | L            | E            | G            | S            | L            | Q            | K            |
| y <sub>n</sub> ions | 958.6 | <u>845.5</u> | <u>774.4</u> | <u>661.4</u> | <u>523.3</u> | 475.3        | <u>388.3</u> | <u>275.2</u> | <u>147.1</u> |



SUPPLEMENTARY DATA

Supplementary Figure 2 B) HLA-B\*3801 Epitope PPI<sub>5-14</sub>

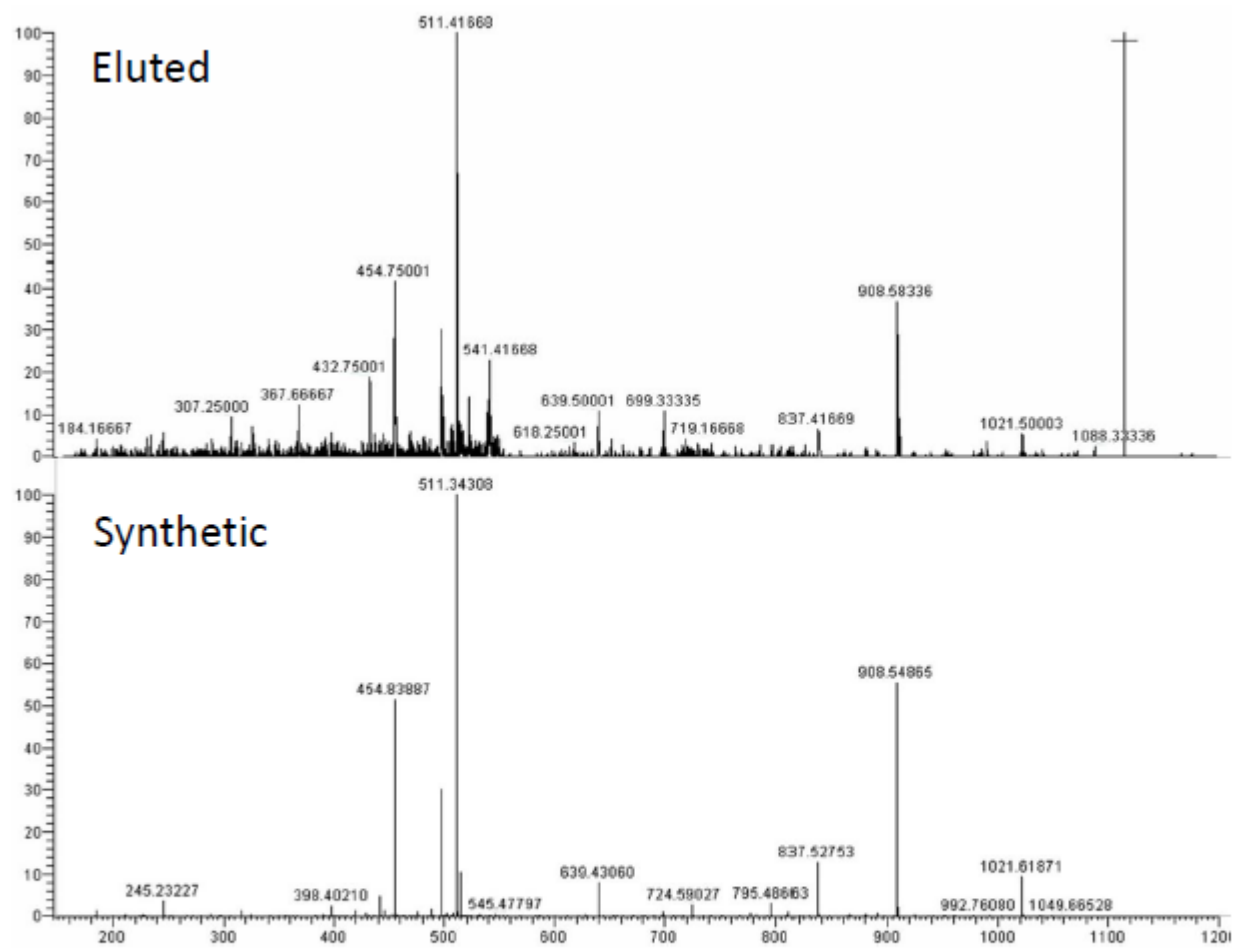

|                     |        |               |       |              |              |              |              |              |               |        |
|---------------------|--------|---------------|-------|--------------|--------------|--------------|--------------|--------------|---------------|--------|
| b <sub>n</sub> ions | 132    | 288.1         | 401.2 | <u>514.3</u> | 611.4        | <u>724.5</u> | <u>837.5</u> | <u>908.6</u> | <u>1021.7</u> | 1134.7 |
| Peptide             | M      | R             | L     | L            | P            | L            | L            | A            | L             | L      |
| y <sub>n</sub> ions | 1177.8 | <u>1021.7</u> | 865.6 | 752.5        | <u>639.4</u> | 542.4        | 429.3        | 316.2        | <u>245.2</u>  | 132.1  |

SUPPLEMENTARY DATA

Supplementary Figure 2 C) HLA-B\*3801 Epitope PPI<sub>33-41</sub>

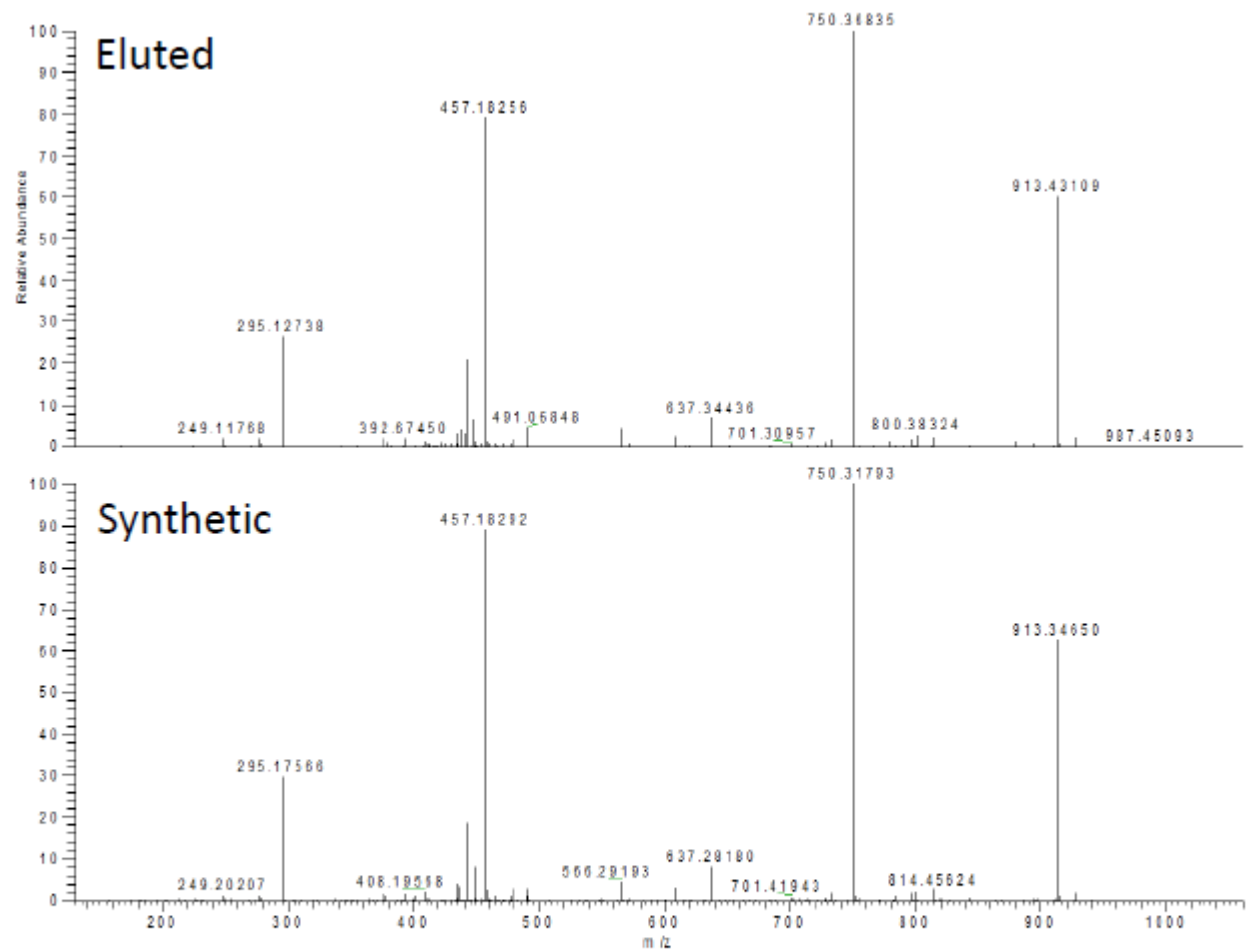

|                     |        |              |              |              |              |              |              |              |        |
|---------------------|--------|--------------|--------------|--------------|--------------|--------------|--------------|--------------|--------|
| b <sub>n</sub> ions | 88     | <u>225.1</u> | <u>338.2</u> | <u>437.3</u> | <u>566.3</u> | <u>637.3</u> | <u>750.4</u> | <u>913.5</u> | 1044.6 |
| Peptide             | S      | H            | L            | V            | E            | A            | L            | Y            | L      |
| y <sub>n</sub> ions | 1044.6 | 957.5        | <u>820.5</u> | <u>707.4</u> | <u>608.3</u> | <u>479.3</u> | <u>408.2</u> | <u>295.2</u> | 132.1  |

SUPPLEMENTARY DATA

**Supplementary Figure S3. Processing of the PPI signal peptide in microsomes.** *In vitro* translation of wt PPI mRNA or mutant PPI mRNA (P9L, A12L, A15L) in the absence (lanes 1) or in the presence of ER-derived microsomes (lanes 2 and 3) and SPP inhibitor (Z-LL)<sub>2</sub>-ketone (lanes 3). Microsomes were isolated and analyzed by SDS-PAGE, and radiolabeled proteins visualized by phosphorimaging. Lane 4, *in vitro*-translated reference. Images are representative images of n=2, apart from wt where n=5. Equal translocation efficiency and PPI precursor availability for processing was controlled by comparing the amount of proinsulin between conditions.

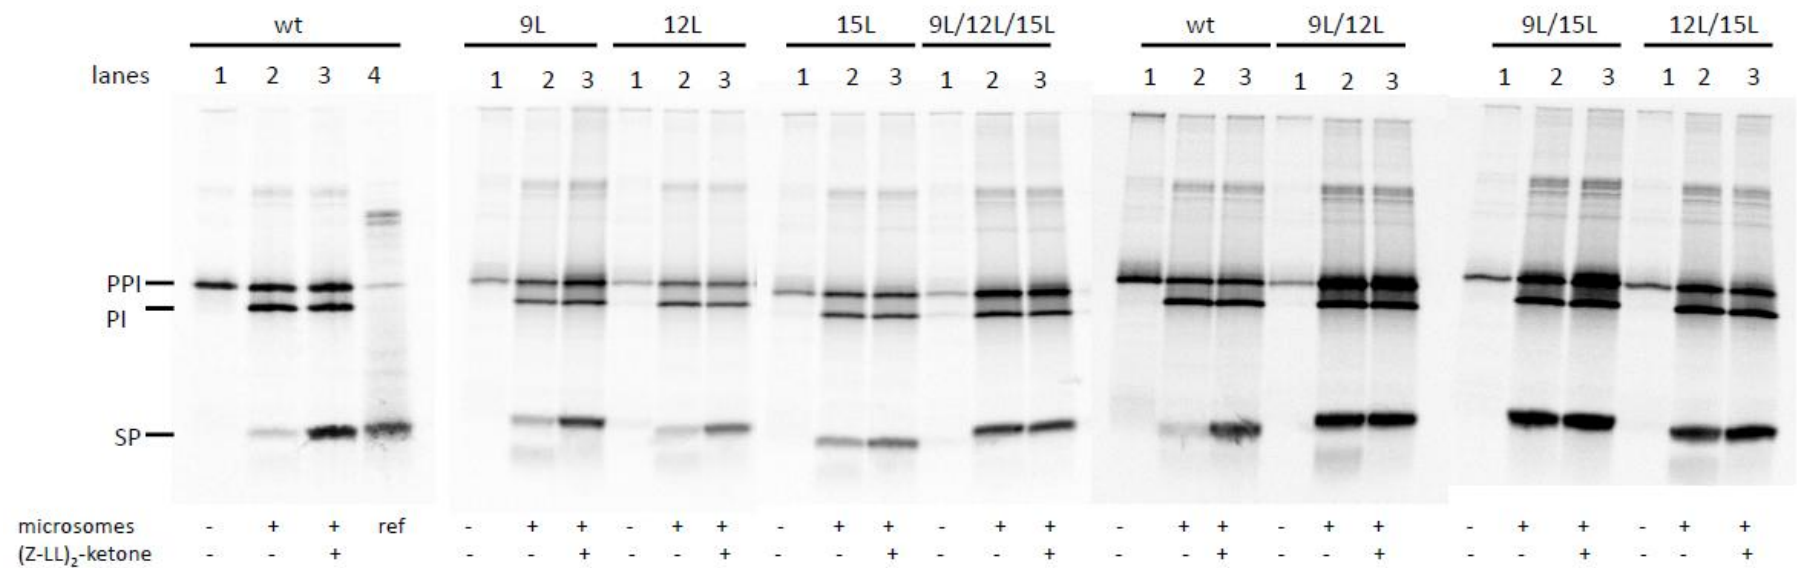

SUPPLEMENTARY DATA

**Supplementary Figure S4. Validation of SPP knockout (truncation) by PCR.** Within the K562-A2-PPI cells line the SPP gene was truncated using CRISPR-Cas9 directed double targeting of each exon at the start and end of the gene. Simultaneous targeting leads to truncation of the gene in effect leading to functional gene knockout. Length of the gene was assessed using PCR with SPP specific primers on cDNA generated from isolated mRNA from the cell lines. WT (lane 1 and 2) and mock transfected (lane 3 and 4) cell lines harbour full length SPP, whereas reduction (lane 6 and 7) in size or abrogation (lane 5) was observed for cell lines with effective CRISPR-Cas9 targeting of SPP.

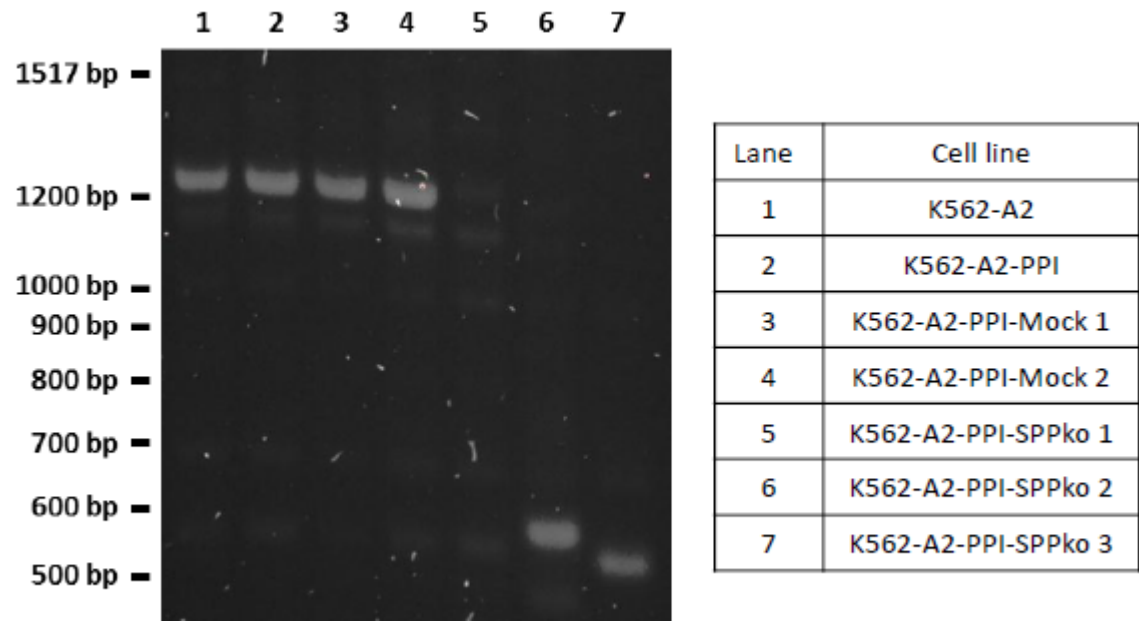

SUPPLEMENTARY DATA

**Supplementary Figure S5. HLA class I surface expression on Mock and SPPko cell lines.** Cell lines were stained with anti-pan HLA class I antibody (HLA, black line) and corresponding isotype control (ISO, grey line) antibody. Levels of surface HLA expression are similar for each experimental condition (WT, mock and SPP knockout).

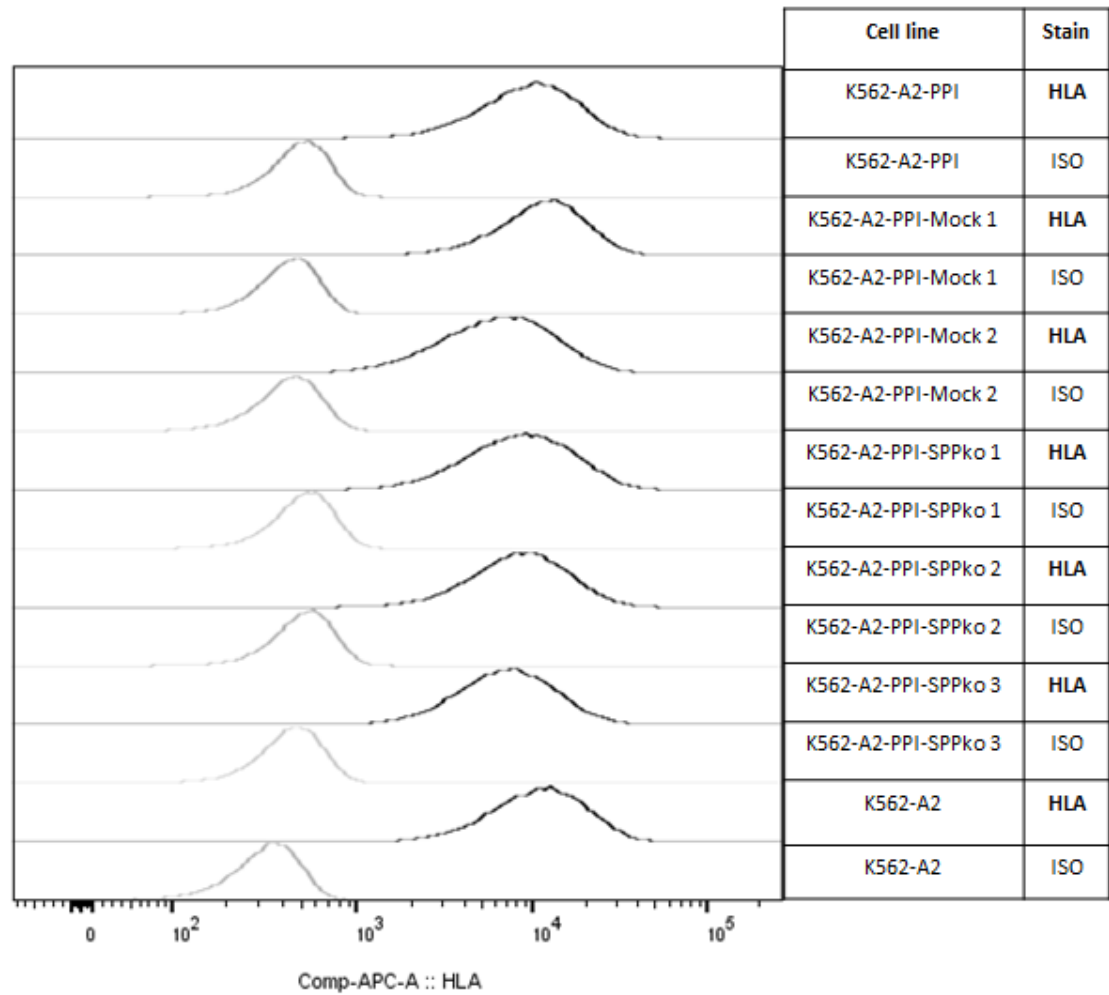

## SUPPLEMENTARY DATA

**Supplementary Figure S6. Pulsing SPPko cells with cognate peptide rescues their phenotype.** K562-A2 and K562-A2-PPI-SPPko cell lines were pulsed for 1 hour with 10uM/ml peptide or peptide diluent (DMSO) prior to co-culture with T cell clone specific for PPI<sub>15-24</sub>-HLA-A0201. T cell activation was assessed by CD107a expression. For each SPPko cell line, peptide pulsing leads to increased T cell activation as evidenced by both increases in percentage expression of CD107a (left) and median fluorescence intensity of CD107a (right) with comparable levels in the pulsed WT K562-A2 cell line. Three independent experiments.

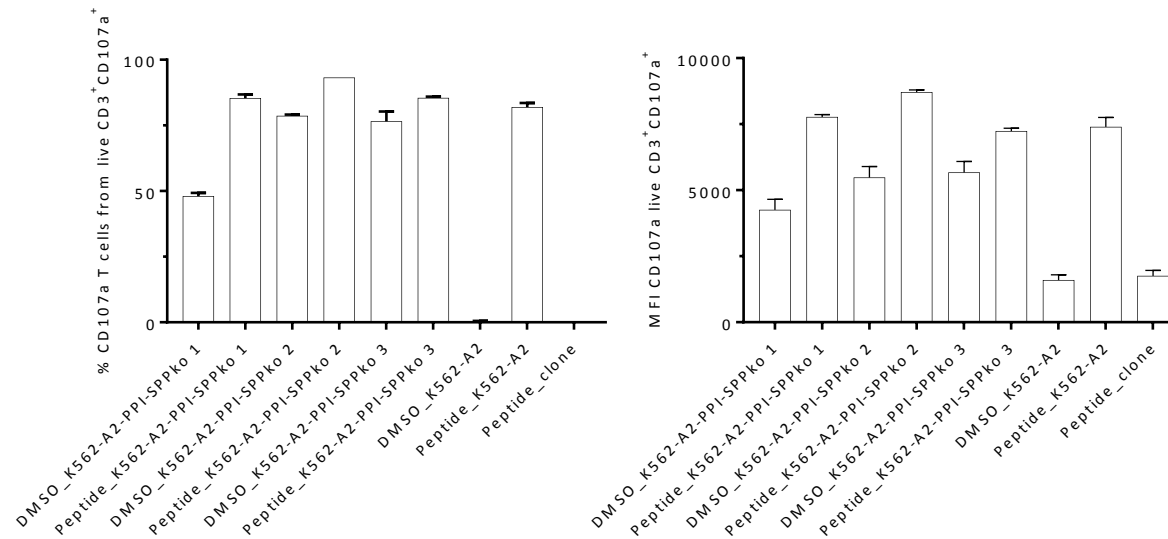

SUPPLEMENTARY DATA

**Supplementary Figure S7. HLA class I expression in siRNA experiments.** Surface HLA-ABC (W6/32 clone) expression on b2M, ERAP1, ERAP2, TAP1, TAP2, scramble knockdown treated and untreated K562-A24-PPI respectively (HLA, black line) and isotype control (ISO, grey line). Median Fluorescence Intensity (MFI) of HLA staining is shown.

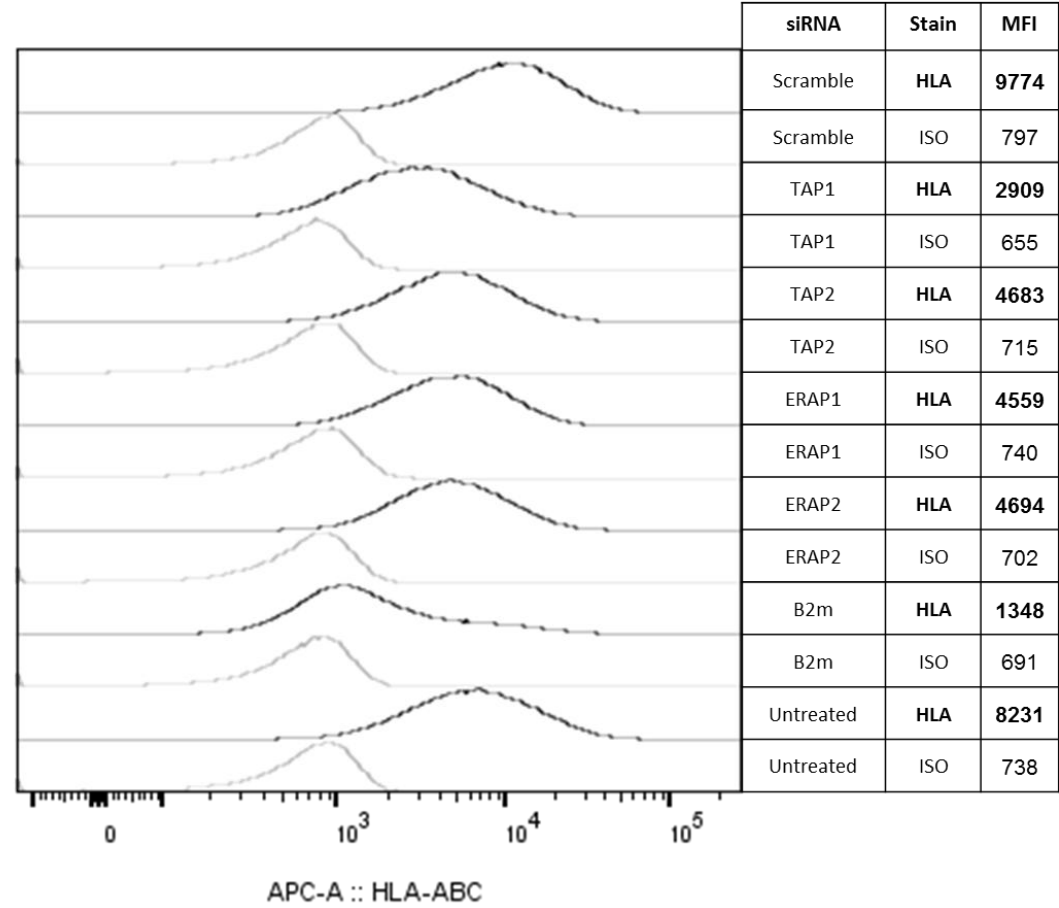

## SUPPLEMENTARY DATA

**Supplementary Figure S8. Representative immunohistochemistry staining of ERAP.** Representative immunohistochemistry staining of ERAP on pancreas samples from patients with type 1 diabetes (n=3) and a representative control sample. ERAP is expressed in all islet cells irrespective of sample source and pancreas samples from type 1 diabetes patients show similar expression in insulin-deficient islets (IDI) and insulin-containing islets (ICI). These data suggest that ERAP expression is not significantly altered in the islets of patients with type 1 diabetes.

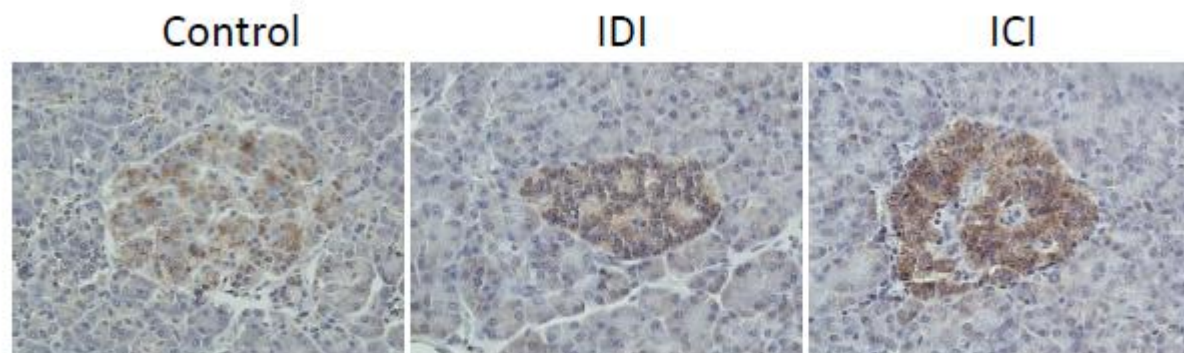

**Supplementary Figure S9. MIP-1 $\beta$  in siRNA experiments.** MIP-1 $\beta$  production of HLA-A2402-restricted PPI<sub>3-11</sub> specific CD8 T cell clone 4C6 upon co-culture with  *$\beta$ 2M*, *TAP1*, *TAP2*, genes (top panel) and *ERAP1*, *ERAP2* gene (bottom panel) knockdown in K562-A24-PPI cells. Two independent experiments.



## SUPPLEMENTARY DATA

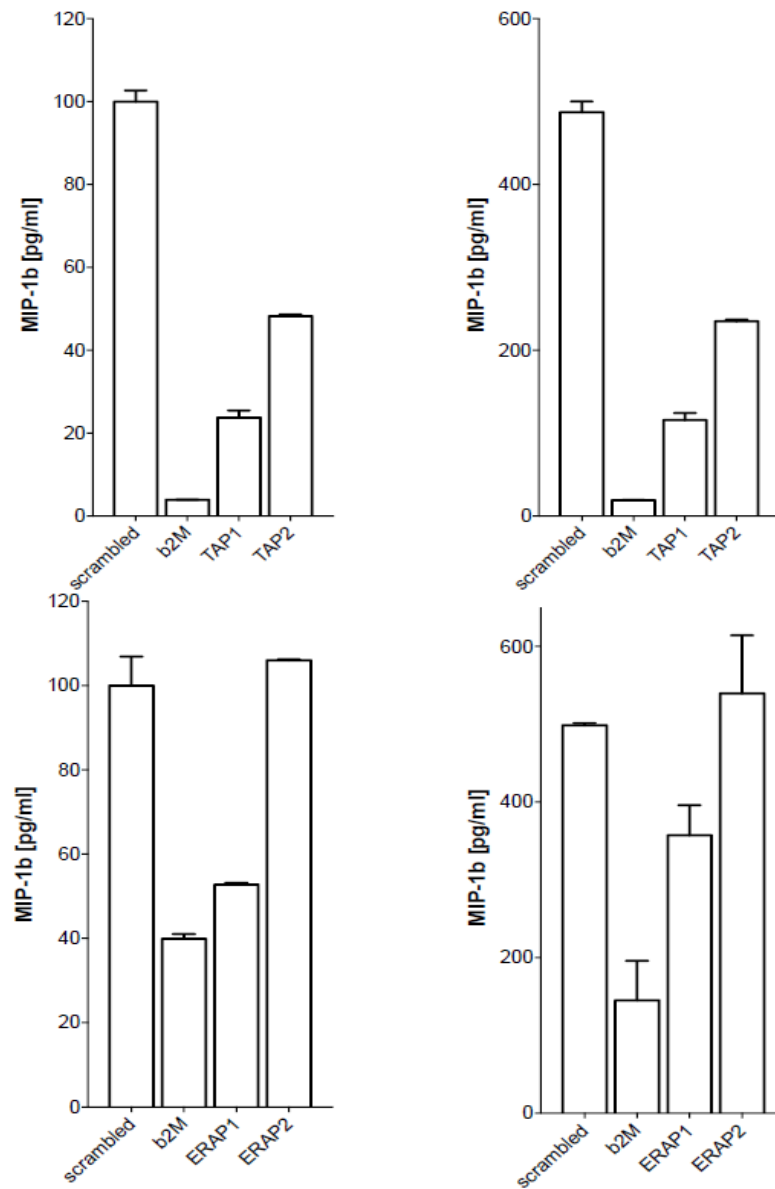

## SUPPLEMENTARY DATA

### References

1. Eichmann M, de Ru A, van Veelen PA, Peakman M, Kronenberg-Versteeg D: Identification and characterisation of peptide binding motifs of six autoimmune disease-associated human leukocyte antigen-class I molecules including HLA-B\*39:06. *Tissue antigens* 2014;84:378-388
2. The UniProt C: UniProt: the universal protein knowledgebase. *Nucleic Acids Res* 2017;45:D158-D169
3. Rammensee H, Bachmann J, Emmerich NP, Bajor OA, Stevanovic S: SYFPEITHI: database for MHC ligands and peptide motifs. *Immunogenetics* 1999;50:213-219
